# Supplementary material for: Antibody-Based Correlates of Protection against Cholera: Analysis of a Challenge Study of a Cholera-Naive Population
Source: PubMed Central journal article supplement (PMC5583470; doi:10.1128/cvi.00098-17), 2017-08-04
Supplement: CVI.00098-17_zcd999095499s1.pdf [file CVI.00098-17_zcd999095499s1.pdf]

## Appendix

**Figure A1**  
**Distribution of Vibriocidal Antibody Titer on Day 1 for Placebo and Vaccine Groups**

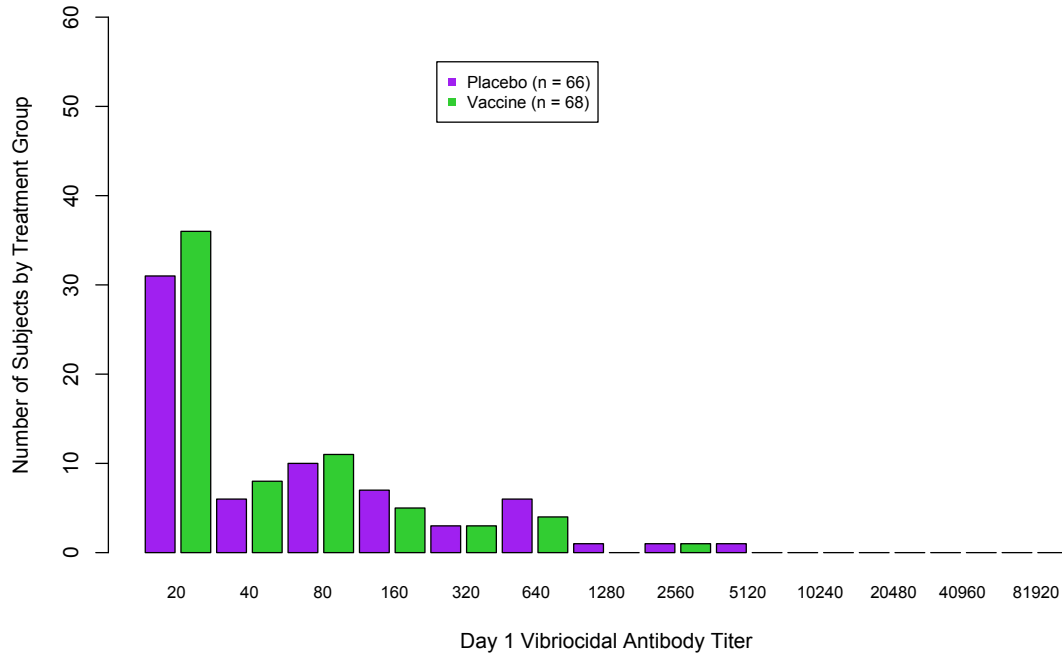

**Table A1**

| Measure of Immune Response                        | Cutoff | Chi-square | p-value |
|---------------------------------------------------|--------|------------|---------|
| Day 10 Vibriocidal Titer                          | 160    | 25         | < 0.001 |
| Day 10 Vibriocidal Titer                          | 320    | 30         | < 0.001 |
| Day 10 Vibriocidal Titer                          | 640    | 30         | < 0.001 |
| Day 10 Vibriocidal Titer                          | 1280   | 28         | < 0.001 |
|                                                   |        |            |         |
| Fold-Increase in Vibr. Titer from Day 0 to Day 10 | 4      | 20         | < 0.001 |
| Fold-Increase in Vibr. Titer from Day 0 to Day 10 | 8      | 25         | < 0.001 |
| Fold-Increase in Vibr. Titer from Day 0 to Day 10 | 16     | 31         | < 0.001 |
| Fold-Increase in Vibr. Titer from Day 0 to Day 10 | 32     | 22         | < 0.001 |

Inspection of the tables in Table A2 reveals that several titer cutoffs and fold-increase cutoffs produce associations with outcome that are of comparable strength. For example, titer cutoffs from 160 to 1280 all produce 2 x 2 chi-square values greater than 20 and p-values less than 0.001, as do fold-increase cutoffs from 4 to 32.

The cutoffs associated with the Day 10 vibriocidal titer that produced the maximum observed chi-square statistic were 320 and 640 (chi-square = 30,  $p < 0.001$ ), and the cutoff on the fold-increase in titer that produced the maximum chi-square statistic was 16 (chi-square = 31,  $p < 0.001$ ).

**Table A2a**

|                                     |     | Moderate/Severe Cholera |    |
|-------------------------------------|-----|-------------------------|----|
|                                     |     | Yes                     | No |
| Day 10 Vibriocidal Titer $\geq$ 320 | Yes | 1                       | 60 |
|                                     | No  | 5                       | 2  |

**Table A2b**

|                                                                 |     | Moderate/Severe Cholera |    |
|-----------------------------------------------------------------|-----|-------------------------|----|
|                                                                 |     | Yes                     | No |
| Day 0 to Day 10 Fold-Increase<br>in Vibriocidal Titer $\geq$ 16 | Yes | 0                       | 58 |
|                                                                 | No  | 6                       | 4  |

### **Anti-CT GMTs over Time**

Tables A3a and A3b contain the geometric mean of the anti-CT titer over time for each treatment, split by challenge group. The post-vaccination geometric mean titer of anti-CT antibodies reached a maximum at Day 28, too late to be observed in the 10-day challenge group. Thus, titers from the 10-day and 90-day challenge groups were not pooled, and subsequent analysis of the relationship between anti-CT response and total stool volume focused on the data from the 90-day group. Anti-CT titers for placebo subjects were flat over time.

**Table A3a**

Pre-challenge Anti-CT GMTs by Timepoint  
for Vaccinees in Each Challenge Group

|            | Vaccinees Challenged at Day 10 |           | Vaccinees Challenged at Day 90 |           |
|------------|--------------------------------|-----------|--------------------------------|-----------|
|            | Unprotected                    | Protected | Unprotected                    | Protected |
| n          | 2                              | 33        | 4                              | 29        |
| Day 0 GMT  | 259                            | 227       | 347                            | 179       |
| Day 7 GMT  | 259                            | 334       | 675                            | 454       |
| Day 10 GMT | 291                            | 770       | 997                            | 1218      |
| Day 28 GMT | -----                          | -----     | 827                            | 2056      |
| Day 90 GMT | -----                          | -----     | 572                            | 1661      |

**Table A3b**

Pre-challenge Anti-CT GMTs by Timepoint  
for Placebo Subjects in Each Challenge Group

|            | Placebo Subjects Challenged at Day 10 |                                         | Placebo Subjects Challenged at Day 90 |                                         |
|------------|---------------------------------------|-----------------------------------------|---------------------------------------|-----------------------------------------|
|            | Developed Moderate/Severe Cholera     | Did Not Develop Moderate/Severe Cholera | Developed Moderate/Severe Cholera     | Did Not Develop Moderate/Severe Cholera |
| N          | 20                                    | 13                                      | 19                                    | 14                                      |
| Day 0 GMT  | 298                                   | 282                                     | 252                                   | 257                                     |
| Day 7 GMT  | 320                                   | 190                                     | 253                                   | 263                                     |
| Day 10 GMT | 296                                   | 223                                     | 265                                   | 250                                     |
| Day 28 GMT | -----                                 | -----                                   | 234                                   | 283*                                    |
| Day 90 GMT | -----                                 | -----                                   | 237                                   | 217                                     |

\*Anti-CT data for one placebo subject in the 90-day challenge group were not available on Day 28.

Table A4a shows the proportion of subjects in the 10-day challenge study who experienced a four-fold or greater increase in anti-CT titer between Day 0 and Day 10 in each treatment group, and Table A4b indicates the proportion of subjects in the 90-day study who experienced a four-fold or greater increase in anti-CT titer between Day 0 and Day 28 by treatment group. As stated earlier, the post-vaccination anti-CT titer was still increasing at the time of the 10-day challenge, so it is difficult to identify all vaccine responders in the 10-day challenge group. In the 90-day challenge group, 73% of vaccinees experienced a four-fold or greater increase in anti-CT titer by Day 28, when the GMT reached its peak.

**Table A4a**

Proportions of Anti-CT Seroconverters in 10-Day Challenge by Treatment Group

|         | Randomized | Seroconverters at Day 10 | Proportion of Seroconverters | 95% CI on Proportion of Seroconverters |
|---------|------------|--------------------------|------------------------------|----------------------------------------|
| Vaccine | 35         | 13                       | 37%                          | (21%, 55%)                             |
| Placebo | 33         | 1                        | 3%                           | (0.1%, 16%)                            |

**Table A4b**

Proportions of Anti-CT Seroconverters in 90-Day Challenge by Treatment Group

|         | Randomized | Seroconverters at Day 28 | Proportion of Seroconverters | 95% CI on Proportion of Seroconverters |
|---------|------------|--------------------------|------------------------------|----------------------------------------|
| Vaccine | 33         | 24                       | 73%                          | (54%, 87%)                             |
| Placebo | 33         | 1                        | 3%                           | (0.1%, 16%)                            |

\*One vaccinee who seroconverted prior to Day 28 had an anti-CT titer on Day 28 that was not at least 4-fold greater than the Day 0 titer. This subject is considered to be a seroconverter on Day 28 using the cumulative definition of seroconversion.
